# Supplementary material for: A Comparative Analysis of Naïve Exosomes and Enhanced Exosomes with a Focus on the Treatment Potential in Ovarian Disorders
Source: MDPI journal article supplement (doi:10.3390/jpm14050482), 2024-04-30
Supplement: s1 [file s1]

| No           | Name     | Fold change | No | Name    | Fold change | No  | Name     | Fold change |
|--------------|----------|-------------|----|---------|-------------|-----|----------|-------------|
| All Proteins |          |             |    |         |             |     |          |             |
| 1            | HIST2H3A | 5.415774    | 43 | CAPRIN1 | 2.030893    | 85  | ILF3     | 1.574275    |
| 2            | LAMA5    | 4.912965    | 44 | USP15   | 1.99445     | 86  | MATR3    | 1.573667    |
| 3            | APLP2    | 4.839289    | 45 | SPTAN1  | 1.946298    | 87  | MRC2     | 1.567592    |
| 4            | FXR1     | 4.057065    | 46 | PXDN    | 1.927531    | 88  | PSMG1    | 1.542099    |
| 5            | EFEMP1   | 3.848948    | 47 | FKBP9   | 1.915003    | 89  | TUBAL3   | 1.541929    |
| 6            | SF3B3    | 3.700617    | 48 | AP1M1   | 1.902163    | 90  | ACTG1    | 1.537505    |
| 7            | HTRA1    | 3.521209    | 49 | EIF4G1  | 1.879045    | 91  | TPM2     | 1.524892    |
| 8            | UBA2     | 3.384767    | 50 | RAB2A   | 1.874018    | 92  | PTBP1    | 1.522484    |
| 9            | MMP19    | 3.333479    | 51 | NXN     | 1.86393     | 93  | SEC23A   | 1.522406    |
| 10           | SRPX     | 3.321563    | 52 | DDX39A  | 1.863168    | 94  | PTPN1    | 1.517119    |
| 11           | HMGA2    | 3.281848    | 53 | NUDT21  | 1.850507    | 95  | NID2     | 1.514909    |
| 12           | PTGES3   | 3.264797    | 54 | AARS    | 1.835753    | 96  | GLS      | 1.513476    |
| 13           | PREP     | 3.107649    | 55 | LRRC17  | 1.804368    | 97  | SF3B1    | 1.502484    |
| 14           | MGAT5    | 2.894506    | 56 | PSME3   | 1.801918    | 98  | XRCC5    | 1.502248    |
| 15           | RHOA     | 2.882499    | 57 | IAH1    | 1.797593    | 99  | SPTBN1   | 1.500168    |
| 16           | ADD3     | 2.85615     | 58 | CRTAP   | 1.788128    | 100 | NUP93    | 1.494096    |
| 17           | CDC42BPB | 2.853821    | 59 | MFAP4   | 1.785901    | 101 | YWHAE    | 1.489433    |
| 18           | UNC45A   | 2.850593    | 60 | NUCB1   | 1.783986    | 102 | ECH1     | 1.487053    |
| 19           | CDH23    | 2.80839     | 61 | HNRNPR  | 1.776111    | 103 | SPON2    | 1.468898    |
| 20           | PGAM5    | 2.806167    | 62 | UGGT1   | 1.763243    | 104 | NUP98    | 1.466304    |
| 21           | PAM      | 2.766931    | 63 | POSTN   | 1.758704    | 105 | PFKM     | 1.461211    |
| 22           | RSU1     | 2.674164    | 64 | SEC24D  | 1.75617     | 106 | EEF1D    | 1.44615     |
| 23           | ARL1     | 2.633532    | 65 | DRG2    | 1.750284    | 107 | ADSL     | 1.431011    |
| 24           | SNRPD1   | 2.589605    | 66 | ARMT1   | 1.74827     | 108 | RPS24    | 1.428671    |
| 25           | GNPAT    | 2.537942    | 67 | TOP1    | 1.733486    | 109 | CAPN2    | 1.425369    |
| 26           | MCM4     | 2.492846    | 68 | RCN1    | 1.729342    | 110 | NAP1L1   | 1.411412    |
| 27           | SDF4     | 2.474751    | 69 | TIMM44  | 1.722561    | 111 | LTBP1    | 1.402398    |
| 28           | SMARCA5  | 2.467528    | 70 | ALDH9A1 | 1.711249    | 112 | FBLN1    | 1.392655    |
| 29           | HEATR1   | 2.418155    | 71 | UGP2    | 1.70947     | 113 | SYNCRIP  | 1.391316    |
| 30           | MCM2     | 2.387727    | 72 | NUP133  | 1.707811    | 114 | FKBP11   | 1.390567    |
| 31           | ANTXR1   | 2.379471    | 73 | CLU     | 1.706395    | 115 | HNRNPA1  | 1.383585    |
| 32           | PRKAG1   | 2.320002    | 74 | NACA    | 1.704063    | 116 | HNRNPA3  | 1.376628    |
| 33           | TRAP1    | 2.287293    | 75 | CSE1L   | 1.701936    | 117 | HNRNPK   | 1.375381    |
| 34           | EIF3H    | 2.207335    | 76 | AGRN    | 1.694546    | 118 | EMILIN1  | 1.372395    |
| 35           | RPS15    | 2.185175    | 77 | GBE1    | 1.691186    | 119 | CLSTN1   | 1.370861    |
| 36           | MATN3    | 2.174195    | 78 | CCAR2   | 1.688942    | 120 | IFI16    | 1.355165    |
| 37           | MATN2    | 2.14227     | 79 | MTDH    | 1.68379     | 121 | SERPINF1 | 1.35243     |
| 38           | TOP2B    | 2.130412    | 80 | COPE    | 1.683695    | 122 | HADHA    | 1.349318    |
| 39           | BTF3     | 2.125791    | 81 | PSME1   | 1.675359    | 123 | CNN2     | 1.347437    |
| 40           | CHD4     | 2.092596    | 82 | NAMPT   | 1.654905    | 124 | FASN     | 1.341763    |
| 41           | PRMT1    | 2.081544    | 83 | MLEC    | 1.644746    | 125 | RPS7     | 1.336084    |
| 42           | NDUFA12  | 2.057606    | 84 | GOLT1B  | 1.599967    | 126 | NCKAP1   | 1.327883    |

|                                |          |          |     |           |          |     |          |          |
|--------------------------------|----------|----------|-----|-----------|----------|-----|----------|----------|
| 127                            | LAP3     | 1.324775 | 149 | EIF3CL    | 1.200711 | 171 | ACO2     | 1.064816 |
| 128                            | SEC61G   | 1.324226 | 150 | COMT      | 1.19536  | 172 | CCDC148  | 1.061061 |
| 129                            | XRCC6    | 1.323747 | 151 | DDX5      | 1.191062 | 173 | COPS3    | 1.055834 |
| 130                            | EIF2S3   | 1.292177 | 152 | STOML2    | 1.174188 | 174 | TGFBI    | 1.049859 |
| 131                            | PDLIM5   | 1.286318 | 153 | MAN2A1    | 1.171845 | 175 | PSMD5    | 1.049785 |
| 132                            | NCL      | 1.285363 | 154 | SRP9      | 1.164959 | 176 | CAPN1    | 1.049089 |
| 133                            | RBBP7    | 1.281747 | 155 | LMNA      | 1.156099 | 177 | GDI2     | 1.047599 |
| 134                            | NT5DC2   | 1.280941 | 156 | HSPG2     | 1.14336  | 178 | TM9SF2   | 1.047567 |
| 135                            | TIA1     | 1.256574 | 157 | CCT5      | 1.13923  | 179 | PGM3     | 1.041765 |
| 136                            | MAMDC2   | 1.253956 | 158 | KARS      | 1.135454 | 180 | SPOCK1   | 1.039038 |
| 137                            | LARS     | 1.249013 | 159 | EEF2      | 1.130744 | 181 | EPRS     | 1.033018 |
| 138                            | HSPH1    | 1.240383 | 160 | SRSF1     | 1.129664 | 182 | COL14A1  | 1.031871 |
| 139                            | THBS2    | 1.239299 | 161 | COPB1     | 1.102414 | 183 | NTMT1    | 1.029058 |
| 140                            | TOMM70   | 1.235044 | 162 | IPO5      | 1.101549 | 184 | AEBP1    | 1.025879 |
| 141                            | PCOLCE   | 1.233321 | 163 | TCP1      | 1.094213 | 185 | SERPINH1 | 1.025467 |
| 142                            | QPCT     | 1.23047  | 164 | SDHB      | 1.076817 | 186 | ASPH     | 1.024545 |
| 143                            | ATAD3A   | 1.223842 | 165 | PDIA6     | 1.074409 | 187 | COPS2    | 1.022048 |
| 144                            | TTLL12   | 1.21968  | 166 | HNRNPA2B1 | 1.073607 | 188 | RBM39    | 1.019784 |
| 145                            | TRA2B    | 1.218602 | 167 | RPLP2     | 1.072141 | 189 | EIF2S1   | 1.014637 |
| 146                            | EEF1G    | 1.214396 | 168 | DDX3X     | 1.067722 | 190 | SNX4     | 1.011258 |
| 147                            | SRI      | 1.212749 | 169 | NID1      | 1.067117 | 191 | IMPDH2   | 1.003026 |
| 148                            | CBR1     | 1.205816 | 170 | GFPT1     | 1.065445 |     |          |          |
| Extracellular vesicle Proteins |          |          |     |           |          |     |          |          |
| 1                              | HIST2H3A | 5.415774 | 24  | NUCB1     | 1.783985 | 46  | FBLN1    | 1.39266  |
| 2                              | LAMA5    | 4.91297  | 25  | UGGT1     | 1.763242 | 47  | HNRNPA1  | 1.383585 |
| 3                              | APLP2    | 4.839288 | 26  | POSTN     | 1.758705 | 48  | HNRNPK   | 1.375375 |
| 4                              | EFEMP1   | 3.848946 | 27  | ALDH9A1   | 1.711245 | 49  | EMILIN1  | 1.372395 |
| 5                              | HTRA1    | 3.521209 | 28  | UGP2      | 1.70947  | 50  | CLSTN1   | 1.37086  |
| 7                              | MMP19    | 3.333482 | 29  | CLU       | 1.706395 | 51  | SERPINF1 | 1.35243  |
| 8                              | MGAT5    | 2.894505 | 30  | CSE1L     | 1.70194  | 52  | CNN2     | 1.347439 |
| 9                              | RHOA     | 2.882499 | 31  | AGRN      | 1.694545 | 53  | FASN     | 1.341765 |
| 10                             | CDC42BPB | 2.853816 | 32  | GBE1      | 1.691186 | 54  | NCKAP1   | 1.327882 |
| 11                             | PAM      | 2.766933 | 33  | PSME1     | 1.675363 | 55  | LAP3     | 1.324778 |
| 12                             | RSU1     | 2.674161 | 34  | NAMPT     | 1.654908 | 56  | XRCC6    | 1.323745 |
| 13                             | SDF4     | 2.474751 | 35  | ILF3      | 1.574274 | 57  | EIF2S3   | 1.292175 |
| 14                             | EIF3H    | 2.207334 | 36  | ACTG1     | 1.537505 | 58  | NCL      | 1.285365 |
| 15                             | MATN3    | 2.174198 | 37  | PTBP1     | 1.522484 | 59  | MAMDC2   | 1.253958 |
| 16                             | MATN2    | 2.142269 | 38  | NID2      | 1.51491  | 60  | HSPH1    | 1.240385 |
| 17                             | SPTAN1   | 1.946295 | 39  | XRCC5     | 1.50225  | 61  | THBS2    | 1.239295 |
| 18                             | PXDN     | 1.927535 | 40  | SPTBN1    | 1.500175 | 62  | TOMM70   | 1.235046 |
| 19                             | AP1M1    | 1.90216  | 41  | YWHAE     | 1.489435 | 63  | PCOLCE   | 1.23332  |
| 20                             | RAB2A    | 1.874022 | 42  | ECH1      | 1.487053 | 64  | QPCT     | 1.230471 |
| 21                             | AARS     | 1.835753 | 43  | SPON2     | 1.468895 | 65  | EEF1G    | 1.2144   |
| 22                             | CRTAP    | 1.804366 | 44  | CAPN2     | 1.42537  | 66  | SRI      | 1.21275  |
| 23                             | MFAP4    | 1.788129 | 45  | LTBP1     | 1.402395 | 67  | CBR1     | 1.205814 |

|                  |          |          |    |           |          |    |           |          |
|------------------|----------|----------|----|-----------|----------|----|-----------|----------|
| 68               | COMT     | 1.19536  | 76 | PDIA6     | 1.07441  | 84 | GDI2      | 1.0476   |
| 69               | DDX5     | 1.19106  | 77 | HNRNPA2B1 | 1.07361  | 85 | TM9SF2    | 1.047571 |
| 70               | MAN2A1   | 1.171845 | 78 | RPLP2     | 1.072145 | 86 | SPOCK1    | 1.03904  |
| 71               | HSPG2    | 1.14336  | 79 | DDX3X     | 1.06772  | 87 | COL14A1   | 1.031875 |
| 72               | CCT5     | 1.13923  | 80 | NID1      | 1.06712  | 88 | AEBP1     | 1.025875 |
| 73               | KARS     | 1.135458 | 81 | GFPT1     | 1.06544  | 89 | SERPINH1  | 1.025465 |
| 74               | EEF2     | 1.13075  | 82 | TGFBI     | 1.049855 | 90 | EIF2S1    | 1.014636 |
| 75               | TCP1     | 1.09421  | 83 | CAPN1     | 1.04909  | 91 | IMPDH2    | 1.003025 |
| Exosome Proteins |          |          |    |           |          |    |           |          |
| 1                | HIST2H3A | 5.415775 | 25 | GBE1      | 1.691186 | 49 | QPCT      | 1.230471 |
| 2                | LAMA5    | 4.91297  | 26 | PSME1     | 1.675363 | 50 | EEF1G     | 1.2144   |
| 3                | APLP2    | 4.839288 | 27 | NAMPT     | 1.654908 | 51 | SRI       | 1.21275  |
| 4                | EFEMP1   | 3.848946 | 28 | ACTG1     | 1.537505 | 52 | CBR1      | 1.205814 |
| 5                | HTRA1    | 3.521209 | 29 | PTBP1     | 1.522484 | 53 | COMT      | 1.19536  |
| 6                | MGAT5    | 2.894505 | 30 | NID2      | 1.51491  | 54 | DDX5      | 1.19106  |
| 7                | RHOA     | 2.882499 | 31 | SPTBN1    | 1.500175 | 55 | MAN2A1    | 1.171845 |
| 8                | CDC42BPB | 2.853816 | 32 | YWHAE     | 1.489435 | 56 | HSPG2     | 1.14336  |
| 9                | PAM      | 2.766933 | 33 | ECH1      | 1.487053 | 57 | CCT5      | 1.13923  |
| 10               | RSU1     | 2.674161 | 34 | SPON2     | 1.468895 | 58 | EEF2      | 1.13075  |
| 11               | SDF4     | 2.474751 | 35 | CAPN2     | 1.42537  | 59 | TCP1      | 1.09421  |
| 12               | EIF3H    | 2.207334 | 36 | FBLN1     | 1.39266  | 60 | PDIA6     | 1.07441  |
| 13               | SPTAN1   | 1.946295 | 37 | HNRNPA1   | 1.383585 | 61 | HNRNPA2B1 | 1.07361  |
| 14               | PXDN     | 1.927535 | 38 | HNRNPK    | 1.375375 | 62 | RPLP2     | 1.072145 |
| 15               | AP1M1    | 1.90216  | 39 | EMILIN1   | 1.372395 | 63 | DDX3X     | 1.06772  |
| 16               | RAB2A    | 1.874022 | 40 | SERPINF1  | 1.35243  | 64 | NID1      | 1.06712  |
| 17               | AARS     | 1.835753 | 41 | FASN      | 1.341765 | 65 | GFPT1     | 1.06544  |
| 18               | NUCB1    | 1.783985 | 42 | NCKAP1    | 1.327882 | 66 | TGFBI     | 1.049855 |
| 19               | UGGT1    | 1.763242 | 43 | LAP3      | 1.324778 | 67 | CAPN1     | 1.04909  |
| 20               | ALDH9A1  | 1.711245 | 44 | EIF2S3    | 1.292175 | 68 | GDI2      | 1.0476   |
| 21               | UGP2     | 1.70947  | 45 | NCL       | 1.285365 | 69 | TM9SF2    | 1.047571 |
| 22               | CLU      | 1.706395 | 46 | HSPH1     | 1.240385 | 70 | AEBP1     | 1.025875 |
| 23               | CSE1L    | 1.70194  | 47 | TOMM70    | 1.235046 | 71 | EIF2S1    | 1.014636 |
| 24               | AGRN     | 1.694545 | 48 | PCOLCE    | 1.23332  | 72 | IMPDH2    | 1.003025 |
