# Supplementary material for: A Comparative Analysis of Naïve Exosomes and Enhanced Exosomes with a Focus on the Treatment Potential in Ovarian Disorders
Source: MDPI journal article supplement (doi:10.3390/jpm14050482), 2024-04-30
Supplement: s1 [file s1]

| Name     | KEGG Pathways                                                                                                                                                                                                                                                                                                                                                                                                                                                                                                                                                                                                                                                                                                                                                                                                                                                                                                                                                                                                                                                         |
|----------|-----------------------------------------------------------------------------------------------------------------------------------------------------------------------------------------------------------------------------------------------------------------------------------------------------------------------------------------------------------------------------------------------------------------------------------------------------------------------------------------------------------------------------------------------------------------------------------------------------------------------------------------------------------------------------------------------------------------------------------------------------------------------------------------------------------------------------------------------------------------------------------------------------------------------------------------------------------------------------------------------------------------------------------------------------------------------|
| HIST2H3A | Alcoholism; Systemic lupus erythematosus; Transcriptional misregulation in cancer                                                                                                                                                                                                                                                                                                                                                                                                                                                                                                                                                                                                                                                                                                                                                                                                                                                                                                                                                                                     |
| LAMA5    | Amoebiasis; ECM-receptor interaction; Focal adhesion; Human papillomavirus infection; Pathways in cancer; PI3K-Akt signaling pathway; Small cell lung cancer; Toxoplasmosis                                                                                                                                                                                                                                                                                                                                                                                                                                                                                                                                                                                                                                                                                                                                                                                                                                                                                           |
| FXR1     | RNA transport                                                                                                                                                                                                                                                                                                                                                                                                                                                                                                                                                                                                                                                                                                                                                                                                                                                                                                                                                                                                                                                         |
| SF3B3    | Spliceosome                                                                                                                                                                                                                                                                                                                                                                                                                                                                                                                                                                                                                                                                                                                                                                                                                                                                                                                                                                                                                                                           |
| UBA2     | Ubiquitin mediated proteolysis                                                                                                                                                                                                                                                                                                                                                                                                                                                                                                                                                                                                                                                                                                                                                                                                                                                                                                                                                                                                                                        |
| HMGA2    | MicroRNAs in cancer; Transcriptional misregulation in cancer                                                                                                                                                                                                                                                                                                                                                                                                                                                                                                                                                                                                                                                                                                                                                                                                                                                                                                                                                                                                          |
| PTGES3   | Arachidonic acid metabolism; Metabolic pathways                                                                                                                                                                                                                                                                                                                                                                                                                                                                                                                                                                                                                                                                                                                                                                                                                                                                                                                                                                                                                       |
| PREP     | Renin-angiotensin system                                                                                                                                                                                                                                                                                                                                                                                                                                                                                                                                                                                                                                                                                                                                                                                                                                                                                                                                                                                                                                              |
| MGAT5    | Metabolic pathways; N-Glycan biosynthesis                                                                                                                                                                                                                                                                                                                                                                                                                                                                                                                                                                                                                                                                                                                                                                                                                                                                                                                                                                                                                             |
| RHOA     | Adherens junction; Axon guidance; Bacterial invasion of epithelial cells; cAMP signaling pathway; cGMP-PKG signaling pathway; Chemokine signaling pathway; Colorectal cancer; C-type lectin receptor signaling pathway; Endocytosis; Fluid shear stress and atherosclerosis; Focal adhesion; Human cytomegalovirus infection; Leukocyte transendothelial migration; MicroRNAs in cancer; mTOR signaling pathway; Neurotrophin signaling pathway; NOD-like receptor signaling pathway; Oxytocin signaling pathway; Pancreatic secretion; Parathyroid hormone synthesis, secretion and action; Pathogenic Escherichia coli infection; Pathways in cancer; Pertussis; Phospholipase D signaling pathway; Platelet activation; Proteoglycans in cancer; Rap1 signaling pathway; Ras signaling pathway; Regulation of actin cytoskeleton; Sphingolipid signaling pathway; T cell receptor signaling pathway; TGF-beta signaling pathway; Tight junction; Tuberculosis; Vascular smooth muscle contraction; Viral carcinogenesis; Wnt signaling pathway; Yersinia infection |
| PGAM5    | Mitophagy - animal; Necroptosis; TNF signaling pathway                                                                                                                                                                                                                                                                                                                                                                                                                                                                                                                                                                                                                                                                                                                                                                                                                                                                                                                                                                                                                |
| SNRPD1   | Spliceosome; Systemic lupus erythematosus                                                                                                                                                                                                                                                                                                                                                                                                                                                                                                                                                                                                                                                                                                                                                                                                                                                                                                                                                                                                                             |
| GNPAT    | Glycerophospholipid metabolism; Peroxisome                                                                                                                                                                                                                                                                                                                                                                                                                                                                                                                                                                                                                                                                                                                                                                                                                                                                                                                                                                                                                            |
| MCM4     | Cell cycle; DNA replication                                                                                                                                                                                                                                                                                                                                                                                                                                                                                                                                                                                                                                                                                                                                                                                                                                                                                                                                                                                                                                           |
| HEATR1   | Ribosome biogenesis in eukaryotes                                                                                                                                                                                                                                                                                                                                                                                                                                                                                                                                                                                                                                                                                                                                                                                                                                                                                                                                                                                                                                     |
| MCM2     | Cell cycle; DNA replication                                                                                                                                                                                                                                                                                                                                                                                                                                                                                                                                                                                                                                                                                                                                                                                                                                                                                                                                                                                                                                           |
| ANTXR1   | NOD-like receptor signaling pathway                                                                                                                                                                                                                                                                                                                                                                                                                                                                                                                                                                                                                                                                                                                                                                                                                                                                                                                                                                                                                                   |
| PRKAG1   | Adipocytokine signaling pathway; AMPK signaling pathway; Apelin signaling pathway; Circadian rhythm; FoxO signaling pathway; Glucagon signaling pathway; Hypertrophic cardiomyopathy (HCM); Insulin resistance; Insulin signaling pathway; Longevity regulating pathway; Longevity regulating pathway - multiple species; Non-alcoholic fatty liver disease (NAFLD); Oxytocin signaling pathway; Thermogenesis; Tight junction                                                                                                                                                                                                                                                                                                                                                                                                                                                                                                                                                                                                                                        |
| EIF3H    | Measles; RNA transport                                                                                                                                                                                                                                                                                                                                                                                                                                                                                                                                                                                                                                                                                                                                                                                                                                                                                                                                                                                                                                                |
| RPS15    | Ribosome                                                                                                                                                                                                                                                                                                                                                                                                                                                                                                                                                                                                                                                                                                                                                                                                                                                                                                                                                                                                                                                              |
| TOP2B    | Platinum drug resistance                                                                                                                                                                                                                                                                                                                                                                                                                                                                                                                                                                                                                                                                                                                                                                                                                                                                                                                                                                                                                                              |
| CHD4     | Human papillomavirus infection; Viral carcinogenesis                                                                                                                                                                                                                                                                                                                                                                                                                                                                                                                                                                                                                                                                                                                                                                                                                                                                                                                                                                                                                  |
| PRMT1    | FoxO signaling pathway; Glucagon signaling pathway                                                                                                                                                                                                                                                                                                                                                                                                                                                                                                                                                                                                                                                                                                                                                                                                                                                                                                                                                                                                                    |

|                |                                                                                                                                                                                                                                                                                                                                                                                                                                                                                                                                                                                                                                                                                                                          |
|----------------|--------------------------------------------------------------------------------------------------------------------------------------------------------------------------------------------------------------------------------------------------------------------------------------------------------------------------------------------------------------------------------------------------------------------------------------------------------------------------------------------------------------------------------------------------------------------------------------------------------------------------------------------------------------------------------------------------------------------------|
| <b>NDUFA12</b> | Alzheimer disease; Huntington disease; Metabolic pathways; Non-alcoholic fatty liver disease (NAFLD); Oxidative phosphorylation; Parkinson disease; Retrograde endocannabinoid signaling; Thermogenesis                                                                                                                                                                                                                                                                                                                                                                                                                                                                                                                  |
| <b>USP15</b>   | Mitophagy - animal                                                                                                                                                                                                                                                                                                                                                                                                                                                                                                                                                                                                                                                                                                       |
| <b>SPTAN1</b>  | Apoptosis                                                                                                                                                                                                                                                                                                                                                                                                                                                                                                                                                                                                                                                                                                                |
| <b>AP1M1</b>   | Human immunodeficiency virus 1 infection; Lysosome                                                                                                                                                                                                                                                                                                                                                                                                                                                                                                                                                                                                                                                                       |
| <b>EIF4G1</b>  | RNA transport; Viral myocarditis                                                                                                                                                                                                                                                                                                                                                                                                                                                                                                                                                                                                                                                                                         |
| <b>RAB2A</b>   | AMPK signaling pathway                                                                                                                                                                                                                                                                                                                                                                                                                                                                                                                                                                                                                                                                                                   |
| <b>NUDT21</b>  | mRNA surveillance pathway                                                                                                                                                                                                                                                                                                                                                                                                                                                                                                                                                                                                                                                                                                |
| <b>AARS</b>    | Aminoacyl-tRNA biosynthesis                                                                                                                                                                                                                                                                                                                                                                                                                                                                                                                                                                                                                                                                                              |
| <b>PSME3</b>   | Antigen processing and presentation; Hepatitis C; Proteasome                                                                                                                                                                                                                                                                                                                                                                                                                                                                                                                                                                                                                                                             |
| <b>UGGT1</b>   | Protein processing in endoplasmic reticulum                                                                                                                                                                                                                                                                                                                                                                                                                                                                                                                                                                                                                                                                              |
| <b>SEC24D</b>  | Protein processing in endoplasmic reticulum                                                                                                                                                                                                                                                                                                                                                                                                                                                                                                                                                                                                                                                                              |
| <b>ALDH9A1</b> | Arginine and proline metabolism; Ascorbate and aldarate metabolism; beta-Alanine metabolism; Fatty acid degradation; Glycerolipid metabolism; Glycolysis / Gluconeogenesis; Histidine metabolism; Lysine degradation; Metabolic pathways; Pyruvate metabolism; Tryptophan metabolism; Valine, leucine and isoleucine degradation                                                                                                                                                                                                                                                                                                                                                                                         |
| <b>UGP2</b>    | Amino sugar and nucleotide sugar metabolism; Galactose metabolism; Metabolic pathways; Pentose and glucuronate interconversions; Starch and sucrose metabolism                                                                                                                                                                                                                                                                                                                                                                                                                                                                                                                                                           |
| <b>NUP133</b>  | RNA transport                                                                                                                                                                                                                                                                                                                                                                                                                                                                                                                                                                                                                                                                                                            |
| <b>CLU</b>     | Complement and coagulation cascades                                                                                                                                                                                                                                                                                                                                                                                                                                                                                                                                                                                                                                                                                      |
| <b>AGRN</b>    | ECM-receptor interaction                                                                                                                                                                                                                                                                                                                                                                                                                                                                                                                                                                                                                                                                                                 |
| <b>GBE1</b>    | Metabolic pathways; Starch and sucrose metabolism                                                                                                                                                                                                                                                                                                                                                                                                                                                                                                                                                                                                                                                                        |
| <b>PSME1</b>   | Antigen processing and presentation; Proteasome                                                                                                                                                                                                                                                                                                                                                                                                                                                                                                                                                                                                                                                                          |
| <b>NAMPT</b>   | Metabolic pathways; Nicotinate and nicotinamide metabolism; NOD-like receptor signaling pathway                                                                                                                                                                                                                                                                                                                                                                                                                                                                                                                                                                                                                          |
| <b>MRC2</b>    | Phagosome; Tuberculosis                                                                                                                                                                                                                                                                                                                                                                                                                                                                                                                                                                                                                                                                                                  |
| <b>TUBAL3</b>  | Apoptosis; Gap junction; Pathogenic Escherichia coli infection; Phagosome; Tight junction                                                                                                                                                                                                                                                                                                                                                                                                                                                                                                                                                                                                                                |
| <b>ACTG1</b>   | Adherens junction; Apoptosis; Arrhythmogenic right ventricular cardiomyopathy (ARVC); Bacterial invasion of epithelial cells; Dilated cardiomyopathy (DCM); Fluid shear stress and atherosclerosis; Focal adhesion; Hepatocellular carcinoma; Hippo signaling pathway; Hypertrophic cardiomyopathy (HCM); Influenza A; Leukocyte transendothelial migration; Oxytocin signaling pathway; Pathogenic Escherichia coli infection; Phagosome; Platelet activation; Proteoglycans in cancer; Rap1 signaling pathway; Regulation of actin cytoskeleton; Salmonella infection; Shigellosis; Thermogenesis; Thyroid hormone signaling pathway; Tight junction; Vibrio cholerae infection; Viral myocarditis; Yersinia infection |
| <b>TPM2</b>    | Adrenergic signaling in cardiomyocytes; Cardiac muscle contraction; Dilated cardiomyopathy (DCM); Hypertrophic cardiomyopathy (HCM)                                                                                                                                                                                                                                                                                                                                                                                                                                                                                                                                                                                      |
| <b>SEC23A</b>  | Protein processing in endoplasmic reticulum                                                                                                                                                                                                                                                                                                                                                                                                                                                                                                                                                                                                                                                                              |
| <b>PTPN1</b>   | Adherens junction; Insulin resistance; Insulin signaling pathway                                                                                                                                                                                                                                                                                                                                                                                                                                                                                                                                                                                                                                                         |

|                 |                                                                                                                                                                                                                                                                                                                       |
|-----------------|-----------------------------------------------------------------------------------------------------------------------------------------------------------------------------------------------------------------------------------------------------------------------------------------------------------------------|
| <b>GLS</b>      | Alanine, aspartate and glutamate metabolism; Arginine biosynthesis; Central carbon metabolism in cancer; D-Glutamine and D-glutamate metabolism; GABAergic synapse; Glutamatergic synapse; Metabolic pathways; MicroRNAs in cancer; Proximal tubule bicarbonate reclamation                                           |
| <b>SF3B1</b>    | Spliceosome                                                                                                                                                                                                                                                                                                           |
| <b>XRCC5</b>    | Non-homologous end-joining                                                                                                                                                                                                                                                                                            |
| <b>NUP93</b>    | RNA transport                                                                                                                                                                                                                                                                                                         |
| <b>YWHAE</b>    | Cell cycle; Hepatitis C; Hippo signaling pathway; Neurotrophin signaling pathway; Oocyte meiosis; PI3K-Akt signaling pathway; Viral carcinogenesis                                                                                                                                                                    |
| <b>ECH1</b>     | Peroxisome                                                                                                                                                                                                                                                                                                            |
| <b>NUP98</b>    | Influenza A; RNA transport                                                                                                                                                                                                                                                                                            |
| <b>PFKM</b>     | AMPK signaling pathway; Biosynthesis of amino acids; Carbon metabolism; Central carbon metabolism in cancer; Fructose and mannose metabolism; Galactose metabolism; Glucagon signaling pathway; Glycolysis / Gluconeogenesis; HIF-1 signaling pathway; Metabolic pathways; Pentose phosphate pathway; RNA degradation |
| <b>ADSL</b>     | Alanine, aspartate and glutamate metabolism; Metabolic pathways; Purine metabolism                                                                                                                                                                                                                                    |
| <b>RPS24</b>    | Ribosome                                                                                                                                                                                                                                                                                                              |
| <b>CAPN2</b>    | Alzheimer disease; Apoptosis; Cellular senescence; Focal adhesion; Necroptosis; Protein processing in endoplasmic reticulum                                                                                                                                                                                           |
| <b>LTBP1</b>    | TGF-beta signaling pathway                                                                                                                                                                                                                                                                                            |
| <b>HNRNPA1</b>  | Spliceosome                                                                                                                                                                                                                                                                                                           |
| <b>HNRNPA3</b>  | Spliceosome                                                                                                                                                                                                                                                                                                           |
| <b>HNRNPK</b>   | MicroRNAs in cancer; Spliceosome; Viral carcinogenesis                                                                                                                                                                                                                                                                |
| <b>IFI16</b>    | NOD-like receptor signaling pathway                                                                                                                                                                                                                                                                                   |
| <b>SERPINF1</b> | Wnt signaling pathway                                                                                                                                                                                                                                                                                                 |
| <b>HADHA</b>    | beta-Alanine metabolism; Butanoate metabolism; Carbon metabolism; Fatty acid degradation; Fatty acid elongation; Fatty acid metabolism; Lysine degradation; Metabolic pathways; Propanoate metabolism; Tryptophan metabolism; Valine, leucine and isoleucine degradation                                              |
| <b>FASN</b>     | AMPK signaling pathway; Fatty acid biosynthesis; Fatty acid metabolism; Insulin signaling pathway; Metabolic pathways                                                                                                                                                                                                 |
| <b>RPS7</b>     | Ribosome                                                                                                                                                                                                                                                                                                              |
| <b>LAP3</b>     | Arginine and proline metabolism; Glutathione metabolism; Metabolic pathways                                                                                                                                                                                                                                           |
| <b>SEC61G</b>   | Phagosome; Protein export; Protein processing in endoplasmic reticulum; Vibrio cholerae infection                                                                                                                                                                                                                     |
| <b>XRCC6</b>    | Non-homologous end-joining                                                                                                                                                                                                                                                                                            |
| <b>EIF2S3</b>   | RNA transport                                                                                                                                                                                                                                                                                                         |
| <b>NCKAP1</b>   | Regulation of actin cytoskeleton                                                                                                                                                                                                                                                                                      |
| <b>NCL</b>      | Pathogenic Escherichia coli infection                                                                                                                                                                                                                                                                                 |
| <b>LARS</b>     | Aminoacyl-tRNA biosynthesis                                                                                                                                                                                                                                                                                           |
| <b>HSPH1</b>    | Protein processing in endoplasmic reticulum                                                                                                                                                                                                                                                                           |
| <b>THBS2</b>    | ECM-receptor interaction; Focal adhesion; Human papillomavirus infection; Malaria; Phagosome; PI3K-Akt signaling pathway                                                                                                                                                                                              |

|                |                                                                                                                                                                                                                 |
|----------------|-----------------------------------------------------------------------------------------------------------------------------------------------------------------------------------------------------------------|
| <b>TRA2B</b>   | Spliceosome                                                                                                                                                                                                     |
| <b>EEF1G</b>   | Legionellosis                                                                                                                                                                                                   |
| <b>CBR1</b>    | Arachidonic acid metabolism; Chemical carcinogenesis; Folate biosynthesis; Metabolic pathways; Metabolism of xenobiotics by cytochrome P450                                                                     |
| <b>EIF3CL</b>  | RNA transport                                                                                                                                                                                                   |
| <b>COMT</b>    | Dopaminergic synapse; Metabolic pathways; Steroid hormone biosynthesis; Tyrosine metabolism                                                                                                                     |
| <b>DDX5</b>    | Proteoglycans in cancer; Spliceosome; Transcriptional misregulation in cancer                                                                                                                                   |
| <b>MAN2A1</b>  | Metabolic pathways; N-Glycan biosynthesis                                                                                                                                                                       |
| <b>SRP9</b>    | Protein export                                                                                                                                                                                                  |
| <b>LMNA</b>    | Apoptosis; Arrhythmogenic right ventricular cardiomyopathy (ARVC); Dilated cardiomyopathy (DCM); Hypertrophic cardiomyopathy (HCM)                                                                              |
| <b>HSPG2</b>   | ECM-receptor interaction; Hepatitis B; Proteoglycans in cancer                                                                                                                                                  |
| <b>KARS</b>    | Aminoacyl-tRNA biosynthesis                                                                                                                                                                                     |
| <b>EEF2</b>    | AMPK signaling pathway; Oxytocin signaling pathway                                                                                                                                                              |
| <b>SRSF1</b>   | Herpes simplex virus 1 infection; IL-17 signaling pathway; Spliceosome                                                                                                                                          |
| <b>SDHB</b>    | Alzheimer disease; Carbon metabolism; Citrate cycle (TCA cycle); Huntington disease; Metabolic pathways; Non-alcoholic fatty liver disease (NAFLD); Oxidative phosphorylation; Parkinson disease; Thermogenesis |
| <b>PDIA6</b>   | Protein processing in endoplasmic reticulum                                                                                                                                                                     |
| <b>RPLP2</b>   | Ribosome                                                                                                                                                                                                        |
| <b>DDX3X</b>   | Hepatitis B; RIG-I-like receptor signaling pathway; Viral carcinogenesis                                                                                                                                        |
| <b>GFPT1</b>   | Alanine, aspartate and glutamate metabolism; Amino sugar and nucleotide sugar metabolism; Insulin resistance; Metabolic pathways                                                                                |
| <b>ACO2</b>    | 2-Oxocarboxylic acid metabolism; Biosynthesis of amino acids; Carbon metabolism; Citrate cycle (TCA cycle); Glyoxylate and dicarboxylate metabolism; Metabolic pathways                                         |
| <b>CAPN1</b>   | Alzheimer disease; Apoptosis; Cellular senescence; Necroptosis; Protein processing in endoplasmic reticulum                                                                                                     |
| <b>PGM3</b>    | Amino sugar and nucleotide sugar metabolism; Metabolic pathways                                                                                                                                                 |
| <b>EPRS</b>    | Aminoacyl-tRNA biosynthesis; Metabolic pathways; Porphyrin and chlorophyll metabolism                                                                                                                           |
| <b>COL14A1</b> | Protein digestion and absorption                                                                                                                                                                                |
| <b>ASPH</b>    | Calcium signaling pathway; Cardiac muscle contraction                                                                                                                                                           |
| <b>EIF2S1</b>  | Apoptosis; Autophagy - animal; Hepatitis C; Herpes simplex virus 1 infection; Influenza A; Measles; Non-alcoholic fatty liver disease (NAFLD); Protein processing in endoplasmic reticulum; RNA transport       |
| <b>SNX4</b>    | Endocytosis                                                                                                                                                                                                     |
| <b>IMPDH2</b>  | Drug metabolism - other enzymes; Metabolic pathways; Purine metabolism                                                                                                                                          |
