# Supplementary material for: A Comparative Analysis of Naïve Exosomes and Enhanced Exosomes with a Focus on the Treatment Potential in Ovarian Disorders
Source: MDPI journal article supplement (doi:10.3390/jpm14050482), 2024-04-30
Supplement: s1 [file s1]

| No             | Name              | Fold change | P-Value    |
|----------------|-------------------|-------------|------------|
| Upregulation   |                   |             |            |
| 1              | hsa-miR-1-3p      | 3.59172791  | 3.98E-14   |
| 2              | hsa-miR-10399-5p  | 2.87348255  | 0.00082998 |
| 3              | hsa-miR-103a-3p   | 1.49383785  | 0.00037265 |
| 4              | hsa-miR-103b      | 1.49336934  | 0.00037426 |
| 5              | hsa-miR-106a-5p   | 3.24158369  | 0.00136958 |
| 6              | hsa-miR-122-5p    | 1.5476995   | 0.00473977 |
| 7              | hsa-miR-122b-3p   | 1.5476995   | 0.00473977 |
| 8              | hsa-miR-125b-2-3p | 2.14979422  | 0.002639   |
| 9              | hsa-miR-125b-5p   | 1.22773021  | 0.00340961 |
| 10             | hsa-miR-1271-5p   | 1.38021558  | 0.00217771 |
| 11             | hsa-miR-130b-3p   | 2.47667999  | 8.36E-08   |
| 12             | hsa-miR-133a-3p   | 7.81705346  | 1.61E-06   |
| 13             | hsa-miR-133a-5p   | 6.75988533  | 0.00085757 |
| 14             | hsa-miR-183-5p    | 2.17351674  | 3.43E-06   |
| 15             | hsa-miR-184       | 7.00171563  | 2.55E-16   |
| 16             | hsa-miR-203a-3p   | 2.21892924  | 0.00214237 |
| 17             | hsa-miR-203b-5p   | 2.21892924  | 0.00214237 |
| 18             | hsa-miR-206       | 6.88430644  | 0.00051727 |
| 19             | hsa-miR-224-5p    | 3.1203814   | 1.71E-11   |
| 20             | hsa-miR-3177-3p   | 3.4632814   | 5.75E-05   |
| 21             | hsa-miR-335-5p    | 1.18548323  | 0.00502854 |
| 22             | hsa-miR-452-5p    | 4.94481552  | 1.01E-21   |
| 23             | hsa-miR-4802-3p   | 6.75988533  | 0.00085757 |
| 24             | hsa-miR-486-3p    | 3.30622943  | 3.86E-10   |
| 25             | hsa-miR-486-5p    | 3.4069645   | 1.13E-10   |
| 26             | hsa-miR-551a      | 6.75988533  | 0.00085757 |
| 27             | hsa-miR-584-5p    | 2.22954966  | 2.75E-06   |
| 28             | hsa-miR-6500-3p   | 7.75321388  | 3.61E-06   |
| 29             | hsa-miR-675-3p    | 4.33704987  | 7.55E-05   |
| 30             | hsa-miR-6842-3p   | 5.14046577  | 2.40E-07   |
| 31             | hsa-miR-760       | 2.30573093  | 0.00390492 |
| 32             | hsa-miR-9-5p      | 2.59845073  | 3.44E-06   |
| 33             | hsa-miR-92b-5p    | 2.80344337  | 0.0011736  |
| 34             | hsa-miR-99a-5p    | 2.35076907  | 5.01E-08   |
| Downregulation |                   |             |            |
| 1              | hsa-let-7e-3p     | -8.1234092  | 8.20E-08   |
| 2              | hsa-let-7g-5p     | -1.2092036  | 0.00365202 |
| 3              | hsa-miR-103a-2-5p | -2.6281159  | 2.97E-05   |
| 4              | hsa-miR-1260b     | -2.3024136  | 0.00390492 |
| 5              | hsa-miR-1304-5p   | -2.1843225  | 3.51E-05   |
| 6              | hsa-miR-130a-5p   | -4.8633752  | 9.42E-10   |
| 7              | hsa-miR-136-3p    | -1.520873   | 0.00062351 |
| 8              | hsa-miR-145-5p    | -1.2130305  | 0.00574006 |

|    |                  |            |            |
|----|------------------|------------|------------|
| 9  | hsa-miR-148a-3p  | -2.4151652 | 2.27E-08   |
| 10 | hsa-miR-151a-3p  | -1.4835195 | 0.00040116 |
| 11 | hsa-miR-197-3p   | -1.9085419 | 0.00021354 |
| 12 | hsa-miR-199a-5p  | -1.389932  | 0.00094196 |
| 13 | hsa-miR-200b-3p  | -2.1137361 | 0.00021171 |
| 14 | hsa-miR-200c-3p  | -2.5358528 | 5.44E-06   |
| 15 | hsa-miR-205-5p   | -2.2679954 | 0.00049824 |
| 16 | hsa-miR-218-5p   | -1.2356346 | 0.00327085 |
| 17 | hsa-miR-219a-5p  | -6.6816874 | 0.00085757 |
| 18 | hsa-miR-219b-3p  | -6.6816874 | 0.00085757 |
| 19 | hsa-miR-222-3p   | -1.1822339 | 0.00455561 |
| 20 | hsa-miR-24-2-5p  | -2.092012  | 1.43E-06   |
| 21 | hsa-miR-2682-5p  | -2.2881239 | 1.31E-07   |
| 22 | hsa-miR-26a-1-3p | -6.6816874 | 0.00085757 |
| 23 | hsa-miR-29a-5p   | -1.5854265 | 0.00214202 |
| 24 | hsa-miR-30b-3p   | -6.8606054 | 0.00031521 |
| 25 | hsa-miR-30e-3p   | -1.5770671 | 0.00142297 |
| 26 | hsa-miR-3117-3p  | -1.6368347 | 0.00084628 |
| 27 | hsa-miR-3138     | -2.1914474 | 0.00281747 |
| 28 | hsa-miR-3158-3p  | -1.5523796 | 0.00431386 |
| 29 | hsa-miR-337-3p   | -1.3330192 | 0.00350524 |
| 30 | hsa-miR-34c-5p   | -1.4472651 | 0.00074061 |
| 31 | hsa-miR-3605-5p  | -1.5521457 | 0.00231836 |
| 32 | hsa-miR-365a-5p  | -1.6039386 | 0.00231248 |
| 33 | hsa-miR-3688-3p  | -6.3632685 | 0.00417417 |
| 34 | hsa-miR-372-3p   | -6.8606054 | 0.00031521 |
| 35 | hsa-miR-375-3p   | -3.2418091 | 1.03E-06   |
| 36 | hsa-miR-377-3p   | -2.0711849 | 0.00102772 |
| 37 | hsa-miR-381-3p   | -1.9667295 | 3.76E-06   |
| 38 | hsa-miR-410-3p   | -1.7821089 | 0.00015804 |
| 39 | hsa-miR-431-5p   | -2.1771304 | 1.28E-06   |
| 40 | hsa-miR-4504     | -7.2297499 | 4.78E-05   |
| 41 | hsa-miR-451a     | -2.1905684 | 0.00012861 |
| 42 | hsa-miR-455-5p   | -1.2812281 | 0.00218672 |
| 43 | hsa-miR-4775     | -2.2062249 | 0.00040748 |
| 44 | hsa-miR-487b-3p  | -1.7527052 | 4.76E-05   |
| 45 | hsa-miR-493-3p   | -1.9691019 | 3.75E-06   |
| 46 | hsa-miR-493-5p   | -1.2447617 | 0.00285821 |
| 47 | hsa-miR-495-3p   | -1.6327052 | 0.00012179 |
| 48 | hsa-miR-516a-5p  | -8.933553  | 5.13E-10   |
| 49 | hsa-miR-516b-5p  | -6.8731909 | 2.64E-16   |
| 50 | hsa-miR-517a-3p  | -8.6711086 | 7.10E-09   |
| 51 | hsa-miR-518a-3p  | -6.477397  | 0.00243493 |
| 52 | hsa-miR-518b     | -3.735307  | 0.00236482 |
| 53 | hsa-miR-518c-3p  | -7.0932073 | 0.0001205  |

|    |                  |            |            |
|----|------------------|------------|------------|
| 54 | hsa-miR-518e-3p  | -6.477397  | 0.00243493 |
| 55 | hsa-miR-519c-5p  | -7.3544796 | 1.96E-05   |
| 56 | hsa-miR-520a-3p  | -7.0932073 | 0.0001205  |
| 57 | hsa-miR-520g-3p  | -6.7739182 | 0.00051726 |
| 58 | hsa-miR-526b-5p  | -7.6746435 | 2.40E-06   |
| 59 | hsa-miR-532-5p   | -1.3262062 | 0.0016618  |
| 60 | hsa-miR-548aq-3p | -4.4682404 | 2.88E-05   |
| 61 | hsa-miR-548ar-3p | -2.1302381 | 0.00011466 |
| 62 | hsa-miR-548g-5p  | -4.4682404 | 2.88E-05   |
| 63 | hsa-miR-548o-3p  | -1.7487355 | 8.64E-05   |
| 64 | hsa-miR-548u     | -4.0956384 | 0.00034853 |
| 65 | hsa-miR-582-3p   | -2.6527992 | 3.87E-07   |
| 66 | hsa-miR-641      | -1.8728469 | 0.00036298 |
| 67 | hsa-miR-654-5p   | -1.366141  | 0.00175821 |
| 68 | hsa-miR-708-3p   | -1.5201664 | 0.00214422 |
| 69 | hsa-miR-7704     | -2.9962217 | 5.36E-05   |
| 70 | hsa-miR-889-3p   | -1.3915236 | 0.00131223 |
| 71 | novel_215        | -4.3395251 | 8.17E-05   |
| 72 | novel_244        | -6.6816874 | 0.00085757 |
