# Supplementary material for: A Comparative Analysis of Naïve Exosomes and Enhanced Exosomes with a Focus on the Treatment Potential in Ovarian Disorders
Source: MDPI journal article supplement (doi:10.3390/jpm14050482), 2024-04-30
Supplement: s1 [file s1]

| Name of molecule | Type of disease     | Mechanism of Action                                                                                                                                                                                                   | References     |
|------------------|---------------------|-----------------------------------------------------------------------------------------------------------------------------------------------------------------------------------------------------------------------|----------------|
| <b>Protein</b>   |                     |                                                                                                                                                                                                                       |                |
| EFEMP1           | POI                 | Activating AKT signaling pathway                                                                                                                                                                                      | 21, 22         |
| HtrA1            | Ovarian cancer      | Enhancement of chemotherapy sensitivity                                                                                                                                                                               | 23, 24         |
| PAM              | POI                 | Direct role in response to estradiol and ovulation cycle                                                                                                                                                              | 25             |
| SDF4             | Ovarian dysfunction | Improper protein folding                                                                                                                                                                                              | 26             |
| <b>miRNA</b>     |                     |                                                                                                                                                                                                                       |                |
| MiR-1-3p         | Ovarian cancer      | Inhibition of cell proliferation and metastasis in ovarian cancer through targeted gene suppression of c-Met and FZD7, Enhancing chemotherapy sensitivity                                                             | 27, 28, 33     |
| MiR-103a-3p      | Ovarian cancer      | Suppression of proliferation and angiogenesis via CHI3L1 inhibition                                                                                                                                                   | 34             |
| MiR-122-5p       | Ovarian cancer      | Suppression of ovarian cancer cell migration, invasion, and metastasis via targeting P4HA1 gene, and inhibition of CD147-mediated pathways                                                                            | 35, 40         |
| MiR-1271-5p      | Ovarian cancer      | Targeting CCNG1 for ovarian cancer growth inhibition, Regulating mTOR signaling via E2F5, and deactivating Notch signaling through TIAM1 targeting                                                                    | 41, 42         |
| miR-133a-3p      | Ovarian cancer      | Ovarian cancer development inhibition via Wnt/ $\beta$ -catenin signaling pathway suppression                                                                                                                         | 43             |
| MiR-184          | Ovarian cancer      | Induction of apoptosis and inhibition of cell proliferation                                                                                                                                                           | 47, 48         |
| miR-203a-3p      | Ovarian cancer      | Regulation of ovarian cancer proliferation via Akt/GSK-3 $\beta$ /Snail signaling pathway and targeting CXCL1-mediated effects on PI3K/Akt, PLC/PKC, Ras/Erk, and JAK2/STAT3 signaling pathways                       | 49, 50, 51     |
| MiR-206          | Ovarian cancer      | Targeting c-Met to suppress AKT/mTOR signaling pathway activation, Inhibiting cancer cell proliferation, migration, invasion, and inducing apoptosis, alongside KIF2A targeting, Targeting CCND1 and CCND2 to inhibit | 52, 53, 54, 55 |

|             |              |                                                                                                                                                                                                                                                                                                                                                                                            |                    |
|-------------|--------------|--------------------------------------------------------------------------------------------------------------------------------------------------------------------------------------------------------------------------------------------------------------------------------------------------------------------------------------------------------------------------------------------|--------------------|
|             |              | proliferation, progression, migration, and invasion of ovarian cancer cells, Targeting PFKFB3 to regulate cell proliferation via GLUT1, PFKFB3, and FAK, Targeting CDK4 to increase chemotherapy sensitivity                                                                                                                                                                               |                    |
| miR-125b-5p | PCOS         | Targeting Pak3 to activate ERK1/2: Inducing estradiol production and inhibiting granulosa cell death and testosterone production                                                                                                                                                                                                                                                           | 59                 |
| miR-130b-3p | PCOS and POI | Targeting PCOS-related genes DENND1, ZNF217, RAB5B, LHCGR, ERBB3, and KCNA, Interact with insulin signaling via the MAP kinase pathway, targeting ZNF217 for modulating androgen secretion, Targeting PTEN to modulate the PI3K/AKT/mTOR signaling pathway, Resulting in suppression of apoptosis and promotion of cell survival, Impact on SMAD, crucial for granulosa cell proliferation | 60, 61, 62, 63, 65 |
